# Supplementary material for: Graphitic carbon nitride nanosheets with tunable optical properties and their superoxide dismutase mimetic ability
Source: Royal Society of Chemistry journal article supplement (doi:10.1039/c6ra21624b), 2016-01-01
Supplement: c6ra21624b1.pdf [file c6ra21624b1.pdf]

## **Electronic Supplementary Information**

### **Graphitic carbon nitride nanosheets with tunable optical properties and their superoxide dismutase mimetic ability**

Xiangling Ren, Xianwei Meng\*, Jun Ren and Fangqiong Tang

Laboratory of Controllable Preparation and Application of Nanomaterials, Center for  
Micro/nanomaterials and Technology & Key Laboratory of Photochemical  
Conversion and Optoelectronic Materials, Technical Institute of Physics and  
Chemistry, Chinese Academy of Sciences, Beijing 100190, China.

\* Corresponding author.

Tel: 86-10-82543521; Fax: 86-10-62554670

E-mail: mengxw@mail.ipc.ac.cn

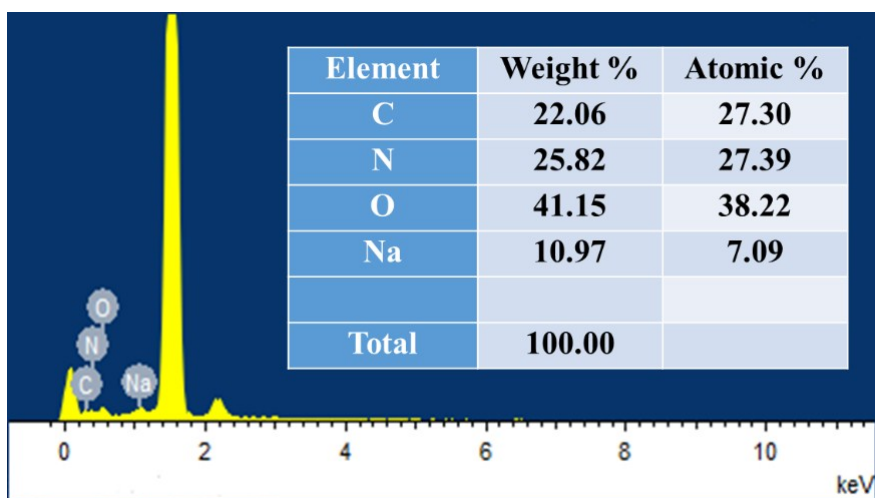

**Fig. S1** EDS of the g-CNNSs.

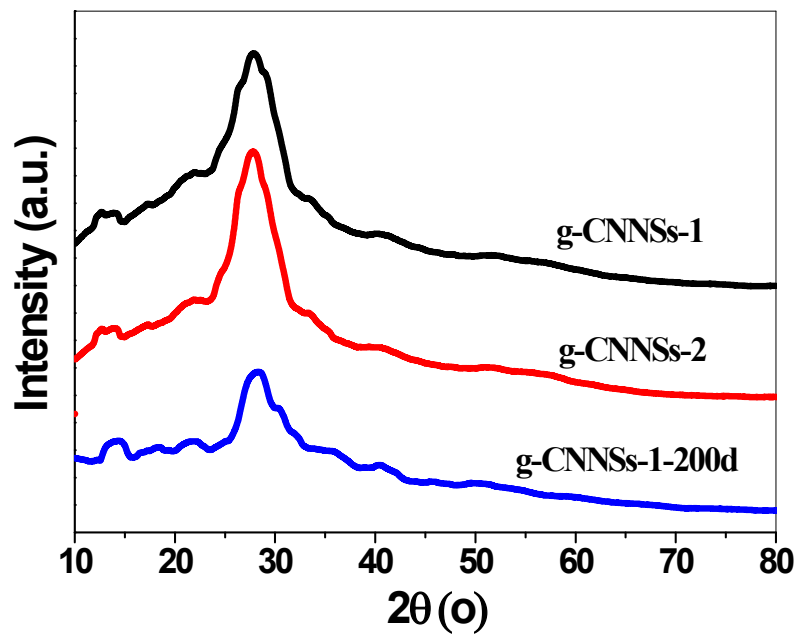

Fig. S2 XRD pattern of the g-CNNSs.

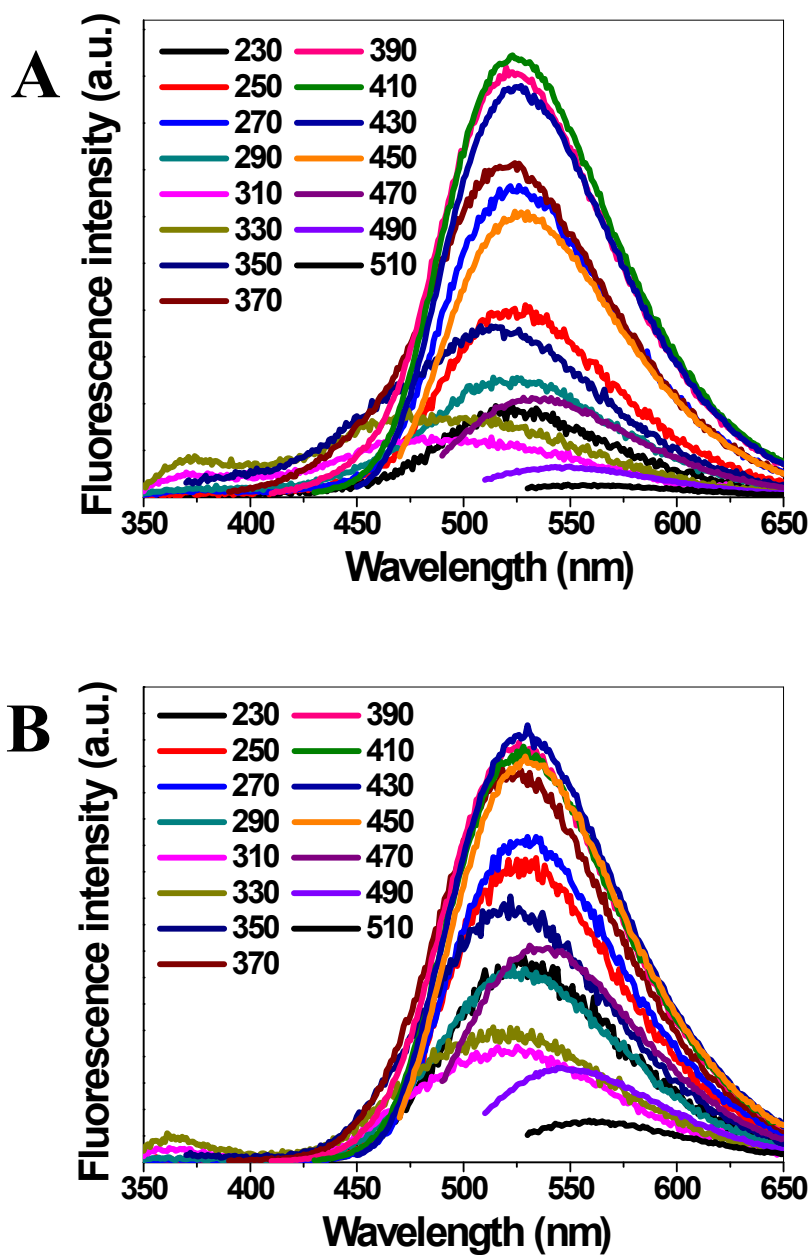

**Fig. S3** Emission spectra of the g-CNNs-1 (A) and g-CNNs-2 (B) recorded progressively longer excitation wavelength of 20 nm increments.

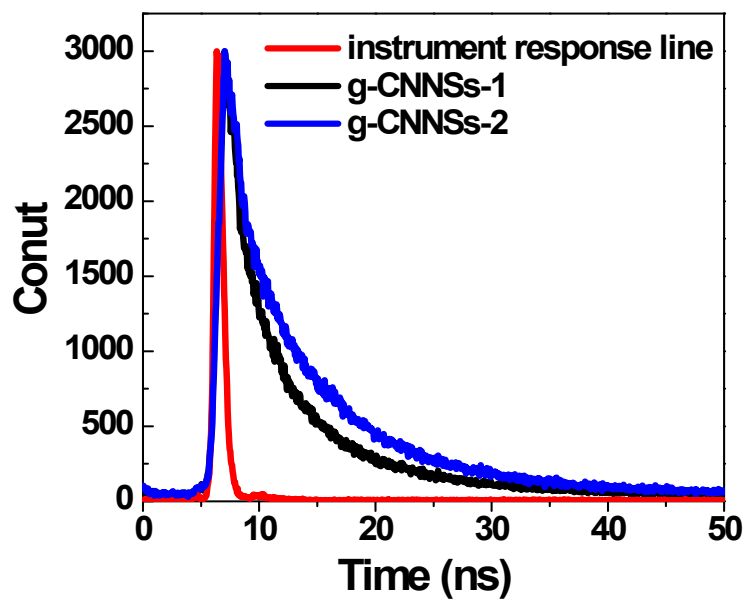

Fig. S4 PL life time of g-CNNs dispersed aqueous solution.

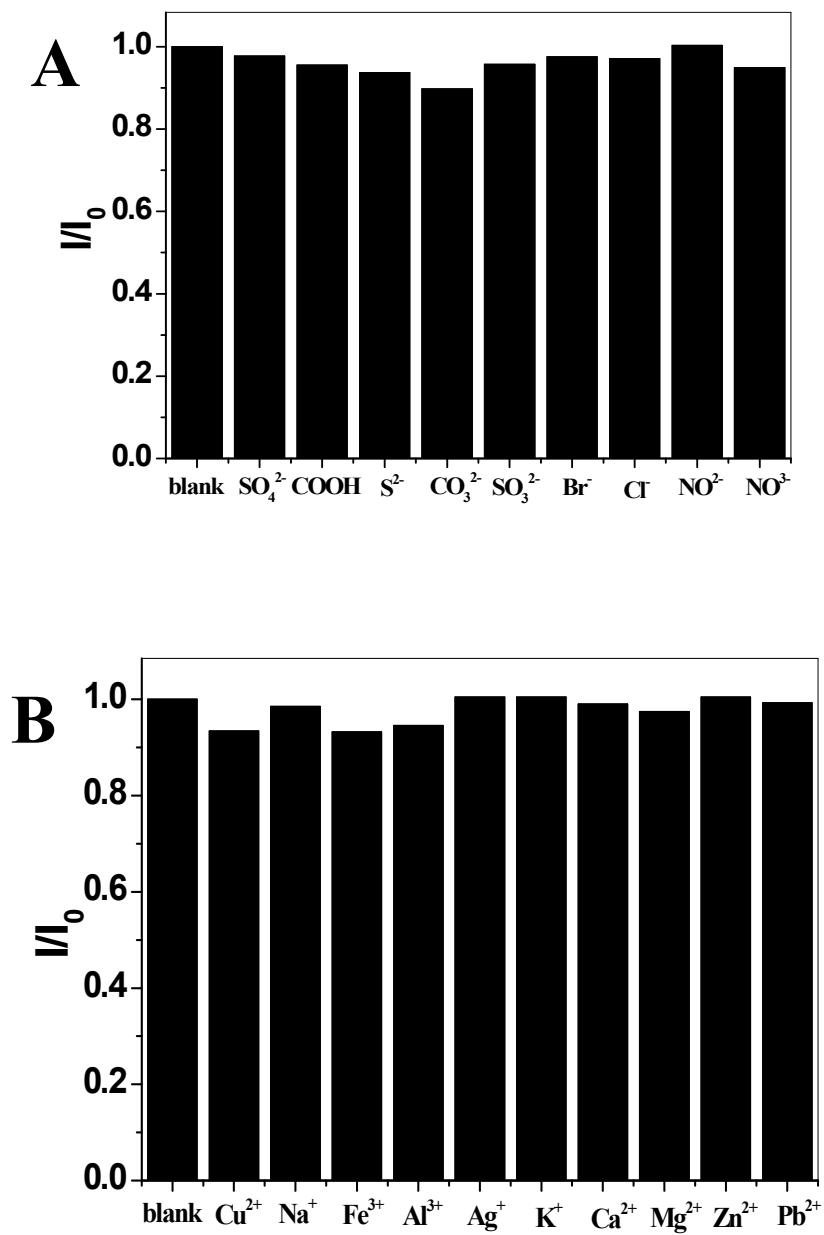

**Fig. S5** (A) Fluorescence changes of g-CNNs with different anions. The concentration of all anions is 500  $\mu\text{M}$ . (B) Fluorescence changes of g-CNNs with different metal ions. The concentrations of all metal ions are 50  $\mu\text{M}$ .  $I_0$  and  $I$  correspond to the fluorescence intensity of g-CNNs in the absence and presence of anions or metal ions.

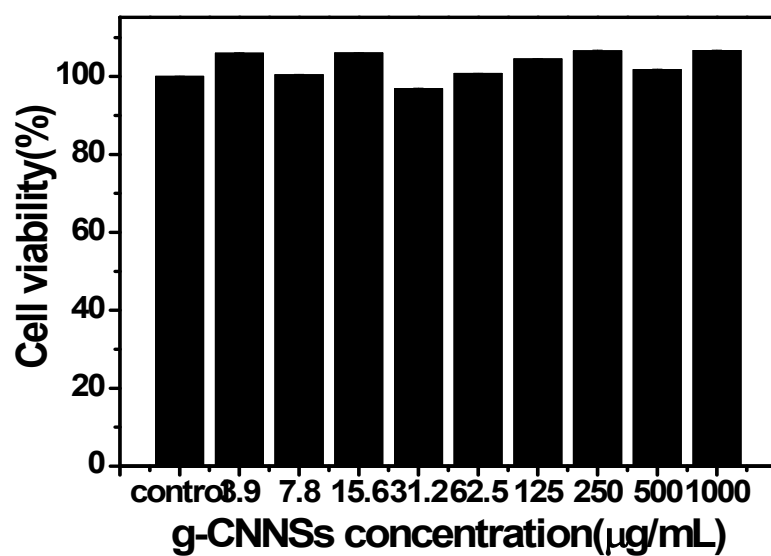

**Fig. S6** The viability of Hep G2 cells with different concentrations of g-CNNs.

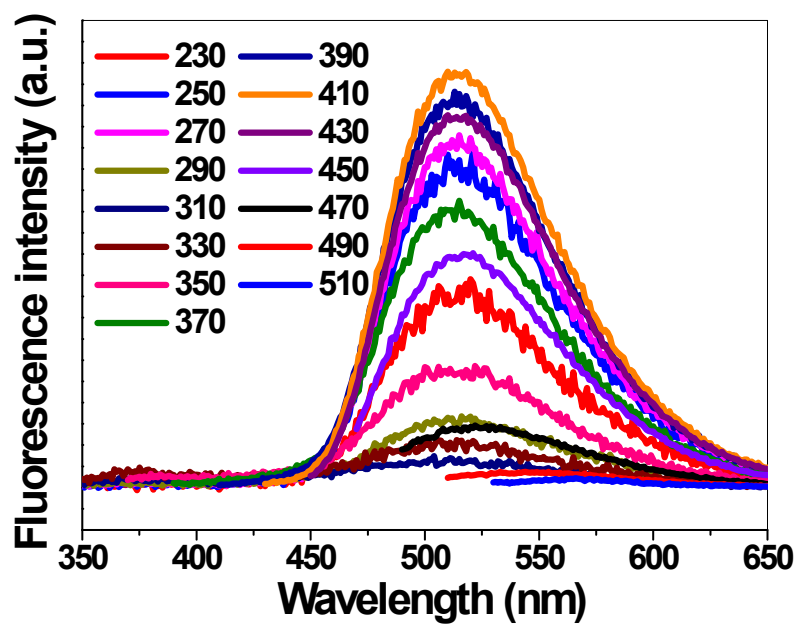

**Fig. S7** Emission spectra of the g-CNNSs-2 in ethanol recorded progressively longer excitation wavelength of 20 nm increments.



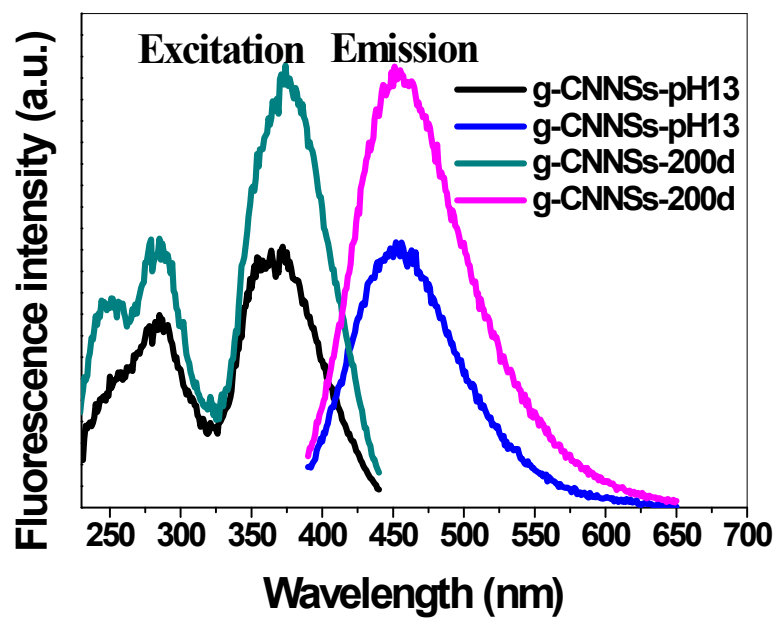

**Fig. S8** Excitation and emission spectra of the g-CNNSs-1 in alkaline solution (pH=13) and storage (200d).

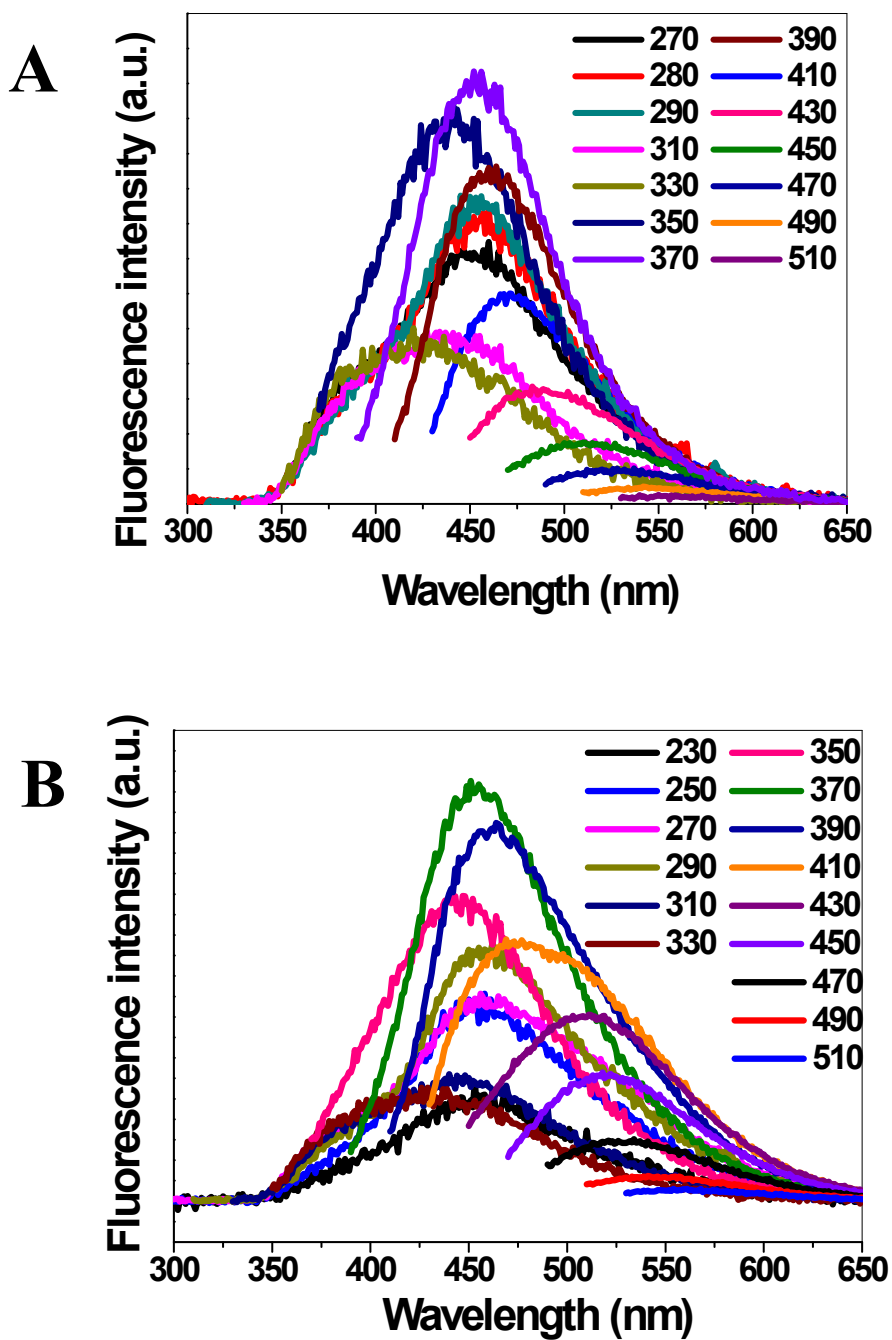

**Fig. S9** Emission spectra of the g-CNNSs-1 in alkaline solution (A, pH=13) and storage (B, 200d) recorded progressively longer excitation wavelength of 20 nm increments.

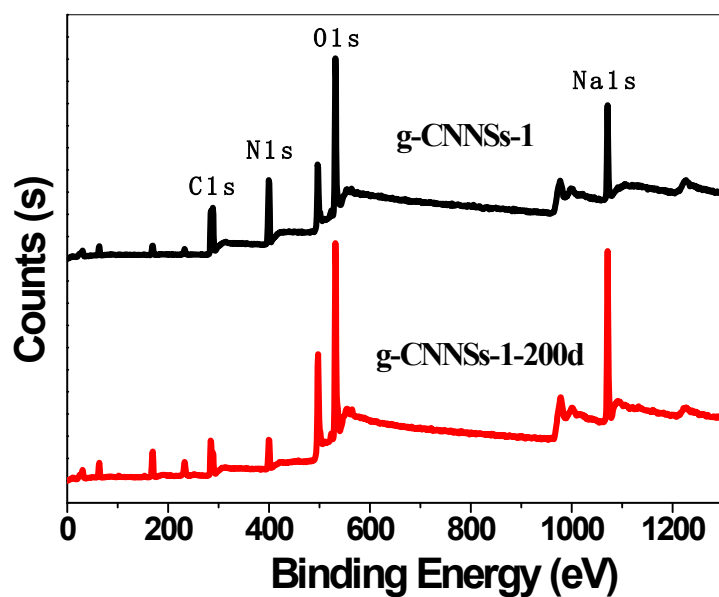

**Fig. S10** XPS analysis of g-CNNSs-1 and g-CNNSs-1-200d in full spectra.

**Table S1** XPS analysis of different atomic content in materials.

| Materials    | Atomic % |       |       |
|--------------|----------|-------|-------|
|              | C1s      | N1s   | O1s   |
| g-CNNSs-1    | 42.14    | 26.26 | 31.6  |
| g-CNNSs-200d | 33.59    | 14.12 | 52.29 |
